# Supplementary material for: Microfluidic Manufacture of Lipid-Based Nanomedicines
Source: MDPI journal article supplement (doi:10.3390/pharmaceutics14091940), 2022-09-14
Supplement: s1 [file s1]

## Supplementary files

# Microfluidic Manufacture of Lipid-based Nanomedicines

Karim Osouli-Bostanabad <sup>1,2</sup>, Sara Puliga <sup>1</sup>, Dolores R. Serrano <sup>3,4,\*</sup>, Andrea Bucchi <sup>5</sup>, Gavin Halbert <sup>6</sup> and Aikaterini Lalatsa <sup>1,2,6,\*</sup>

<sup>1</sup> Biomaterials, Bio-Engineering and Nanomedicine (BioN) Lab, Institute of Biomedical and Biomolecular, Sciences, School of Pharmacy and Biomedical Sciences, University of Portsmouth, White Swan Road, Portsmouth PO1 2DT, UK

<sup>2</sup> School of Pharmacy and Biomedical Sciences, Robertson Wing, University of Strathclyde, 161, Cathedral Street, Glasgow G4 0RE, UK

<sup>3</sup> Pharmaceutics and Food Technology Department, School of Pharmacy, Universidad Complutense de Madrid, Plaza Ramón y Cajal s/n, 28040 Madrid, Spain

<sup>4</sup> Facultad de Farmacia, Instituto Universitario de Farmacia Industrial, Universidad Complutense de Madrid, 28040 Madrid, Spain

<sup>5</sup> School of Mechanical and Design Engineering, Faculty of Technology, University of Portsmouth, Portsmouth PO1 3DJ, UK

<sup>6</sup> CRUK Formulation Unit, School of Pharmacy and Biomedical Sciences, Robertson Wing, University of Strathclyde, 161, Cathedral Street, Glasgow G4 0RE, UK

\* Correspondence: dr.serrano@farm.ucm.es (D.R.S.); aikaterini.lalatsa@strath.ac.uk (A.L.); Tel.: +44-141-548-2675 (A.L.)

**Table S1:** Lipid-based formulations in clinical trials

| System    | Drug/<br>Target    | Product name                                         | Indication                                                     | Clinical trials                  | Sponsor                                  | Ref  |
|-----------|--------------------|------------------------------------------------------|----------------------------------------------------------------|----------------------------------|------------------------------------------|------|
| Liposomes | Mitoxantrone       | Liposomal Mitoxantrone (LEM)                         | Tumours                                                        | Phase 1 Completed (NCT00024492)  | INSYS Therapeutics Inc.                  | [63] |
|           | Belotecan, CKD-602 | PEGylated liposomal formulation of CKD-602, S-CKD602 | Advanced Malignancies                                          | Phase 1 Completed (NCT00177281)  | University of Pittsburgh, ALZA           | [12] |
|           | Topotecan          | Liposomal Topotecan (TLI)                            | Ovarian Cancer, Small Cell Lung Cancer, Advanced Solid Tumours | Phase 1 Completed (NCT00765973)  | Spectrum Pharmaceuticals Inc.            | [64] |
|           | Doxorubicin        | Liposomal Doxorubicin, TLD-1                         | Advanced Solid Tumours                                         | Phase 1 Recruiting (NCT03387917) | Swiss group for clinical cancer research | [65] |
|           | Topotecan          | Topotecan liposomal, INX-0076                        | Advanced Solid Tumours                                         | Phase 1                          | Inex Pharmaceuticals Corporation         | [12] |

|  |                                                                                  |                                                         |                                                                                          |                                                                                     |                                          |          |
|--|----------------------------------------------------------------------------------|---------------------------------------------------------|------------------------------------------------------------------------------------------|-------------------------------------------------------------------------------------|------------------------------------------|----------|
|  | Paclitaxel                                                                       | Liposome                                                | Metastatic Breast Cancer                                                                 | Phase 1 Completed (NCT00080418)<br>Phase 2 Completed (NCT01190982)<br>(NCT00100139) | INSYS Therapeutics Inc.                  | [63, 12] |
|  | Oxaliplatin                                                                      | Liposomal Oxaliplatin MBP-426                           | Advanced or Metastatic Solid Tumours                                                     | Phase 1 Recruiting Completed (NCT00355888)                                          | Mebiopharm Co., Ltd                      | [66]     |
|  | Oxaliplatin / Transferrin                                                        | Liposomal Oxaliplatin, MBP-426/Leucovorin/5-FU          | Second line metastatic gastric, gastro-esophageal junction or oesophageal adenocarcinoma | Phase 2 (NCT00964080)                                                               | Mebiopharm Co., Ltd                      | [67]     |
|  | Doxorubicin / Antibody fragment; human epidermal growth factor receptor 2 (HER2) | PEGylated liposome modified with antibodies, MM-302     | Breast Cancer                                                                            | Phase 1/2 Terminated (NCT02213744)                                                  | Merrimack Pharmaceuticals                | [68]     |
|  | Cisplatin                                                                        | Targeted liposomal cisplatin, LiPlaCis                  | Advanced / Refractory Tumours, Metastatic Breast, skin and prostate cancers              | Phase 1/2 (NCT01861496)                                                             | Allarity Therapeutics                    | [12]     |
|  | Cisplatin                                                                        | Pegylated cisplatin liposomes, SPI-77                   | Ovarian Cancer                                                                           | Phase 2 Completed (NCT00004083)                                                     | NYU Langone Health                       | [63]     |
|  | Lurtotecan                                                                       | Liposomal Lurtotecan, OSI-211                           | Recurrent Small Cell Lung Cancer                                                         | Phase 2 Completed (NCT00046787)                                                     | Astellas Pharma Inc, OSI Pharmaceuticals | [63, 12] |
|  | Doxorubicin                                                                      | Doxorubicin & Microwave induced Hyperthermia, ThermoDox | Hepatocellular Carcinoma                                                                 | Phase 3 Completed (NCT02112656)                                                     | Celsion                                  | [69]     |
|  | Methotrexate                                                                     | MBP-Y003 Transferrin functionalised liposomes           | Lymphoma                                                                                 | NA                                                                                  | Mebiopharm Co., Ltd.                     | [70]     |

|                    |                                                                         |                                                          |                                                                                               |                                                                  |                                                                       |      |
|--------------------|-------------------------------------------------------------------------|----------------------------------------------------------|-----------------------------------------------------------------------------------------------|------------------------------------------------------------------|-----------------------------------------------------------------------|------|
|                    | Docetaxel                                                               | MBP – Y004<br>Transferrin<br>functionalised<br>liposomes |                                                                                               |                                                                  |                                                                       |      |
|                    | Gemcitabine                                                             | MBP – Y005<br>Transferrin<br>functionalised<br>liposomes |                                                                                               |                                                                  |                                                                       |      |
| Lipid<br>complexes | Oncogene MYC<br>(dsRNA)                                                 | DCR-MYC                                                  | Hepatocellular<br>Carcinoma,<br>Solid tumours                                                 | Phase 1/2<br>Terminated<br>(NCT0231405<br>2,<br>NCT0211056<br>3) | Dicerna<br>Pharmaceuticals<br>, Inc.                                  | [71] |
|                    | Polo-like kinase-1<br>(PLK1)                                            | TKM-080301                                               | Neuroendocri<br>ne Tumours,<br>Adrenocorti<br>cal<br>Carcinoma,<br>Advanced<br>Hepatocellular | Phase 1/2<br>Completed<br>(NCT0219187<br>8,<br>NCT0126223<br>5)  | Arbutus<br>Biopharma<br>Corporation                                   | [71] |
|                    | EPH Receptor A2<br>(EphA2) siRNA                                        | EphA2                                                    | Advanced or<br>Recurrent<br>Solid<br>Tumours                                                  | Phase 1<br>Active<br>(NCT0159135<br>6)                           | M.D. Anderson<br>Cancer Center,<br>National Cancer<br>Institute (NCI) | [71] |
|                    | Hepatitis B<br>surface antigen<br>(HBsAg) ds<br>siRNAs                  | ARB-001467                                               | Chronic<br>hepatitis B<br>virus Infection                                                     | Phase 2<br>Completed<br>(NCT0263109<br>6)                        | Arbutus<br>Biopharma<br>Corporation                                   | [71] |
|                    | Apolipoprotein B<br>(ApoB) siRNA                                        | PRO-040201                                               | Hypercholeste<br>rolemia                                                                      | Phase 1<br>Terminated<br>(NCT0092745<br>9)                       | Arbutus<br>Biopharma<br>Corporation                                   | [71] |
|                    | Proprotein<br>convertase<br>subtilisin/kexin<br>type 9 (PCSK9)<br>siRNA | ALN-PCS02                                                | Hypercholeste<br>rolemia,<br>Elevated<br>LDL-<br>Cholesterol<br>(LDL-C)                       | Phase 1<br>Completed<br>(NCT0143705<br>9)                        | Alnylam<br>Pharmaceuticals                                            | [71] |
|                    | Heat shock<br>protein (HSP47)<br>siRNA                                  | siRNAND-L02-<br>s0201                                    | Hepatic<br>fibrosis                                                                           | Phase 1<br>Completed<br>(NCT0222745<br>9)                        | Bristol-Myers<br>Squibb, Nitto<br>Denko<br>Corporation                | [71] |
|                    | HBsAg siRNA                                                             | ARC-520                                                  | Chronic<br>Hepatitis B<br>Virus                                                               | Phase 1<br>Terminated<br>(NCT0092745<br>9)                       | Arrowhead<br>Pharmaceuticals<br>, ICON Clinical<br>Research           | [72] |
|                    | HBsAg siRNA                                                             | DCR HBVS                                                 | Chronic<br>Hepatitis B<br>Virus                                                               | Phase 1<br>Active<br>(NCT0377224<br>9)                           | Dicerna<br>Pharmaceuticals<br>, Inc.                                  | [72] |
|                    | siRNA-kinesin<br>spindle protein                                        | ALN-VSP02                                                | Solid tumours                                                                                 | Phase 1<br>Completed                                             | Alnylam<br>Pharmaceuticals                                            | [73] |

|  |                                                  |                                           |                                                                                              |                                                       |                                            |      |
|--|--------------------------------------------------|-------------------------------------------|----------------------------------------------------------------------------------------------|-------------------------------------------------------|--------------------------------------------|------|
|  | (KSP), Vascular endothelial growth factor (VEGF) |                                           |                                                                                              | (NCT01158079)                                         |                                            |      |
|  | OX40L T cell, IL-23, and IL-36 $\gamma$ antigen  | Lipid Nanoparticle encapsulated mRNA-2752 | Advanced Malignancies                                                                        | Phase 1/2 Recruiting (NCT03739931)                    | ModernaTX, Inc., AstraZeneca               | [74] |
|  | OX40L T cell                                     | Lipid Nanoparticle mRNA-2416              | Relapsed ovarian cancer, Refractory Solid Tumours, Lymphoma                                  | Phase 1 Active (NCT03323398)                          | ModernaTX, Inc.                            | [75] |
|  | Prokaryotic DNA repair enzyme                    | Liposomal T4N5 Lotion                     | Basal skin cell carcinoma, Actinic keratosis, Recurrent skin cancer, Squamous cell carcinoma | Phase 2 Completed (NCT00089180)                       | National Cancer Institute (NCI)            | [76] |
|  | (CD) <sup>8+</sup> and CD <sup>4+</sup> T cell   | Lipo-MERIT                                | Melanoma (Cancer)                                                                            | Phase 1 Active (NCT02410733)                          | BioNTech SE                                | [77] |
|  | Twenty tumour-associated antigens                | mRNA-4157                                 | Melanoma, Solid tumours                                                                      | Phase 1 Active (NCT03313778, NCT03897881)             | ModernaTX, Inc., Merck Sharp & Dohme Corp. | [78] |
|  | MUC1                                             | Liposomal L-BLP-25 (Stimuvax)             | Non-Small Cell Lung Cancer, Multiple Myeloma                                                 | Phase 3 Terminated (NCT01015443)                      | Merck KGaA, Darmstadt, Germany             | [63] |
|  |                                                  | BNT162b2                                  | COVID-19                                                                                     | Phase 1/2, Phase 2/3 (NCT04380701, NCT04368728)       | Pfizer-BioNTech                            | [79] |
|  | S-2P antigen                                     | mRNA-1273                                 | Covid19, SARS-CoV2 Infection                                                                 | Phase 1, 2, 3 (NCT04283461, NCT04405076, NCT04470427) | ModernaTX, Inc.                            | [80] |

#### References:

- Bulbake, U.; Doppalapudi, S.; Kommineni, N.; Khan, W. Liposomal Formulations in

- Clinical Use: An Updated Review. *Pharmaceutics* **2017**, *9*, 12.
63. Fan, Y.; Marioli, M.; Zhang, K. Analytical characterization of liposomes and other lipid nanoparticles for drug delivery. *J. Pharm. Biomed. Anal.* **2021**, *192*, 113642.
  64. Lamichhane, N.; Udayakumar, T.S.; D'Souza, W.D.; Simone II, C.B.; Raghavan, S.R.; Polf, J.; Mahmood, J. Liposomes: Clinical Applications and Potential for Image-Guided Drug Delivery. *Molecules* **2018**, *23*, 288.
  65. Spectrum Pharmaceuticals, I. Topotecan Liposomes Injection for Small Cell Lung Cancer (SCLC), Ovarian Cancer and Other Advanced Solid Tumors. Available online: <https://clinicaltrials.gov/ct2/show/NCT00765973> (accessed on 13 November 2020).
  66. Research, S.G.f.C.C. TLD-1, a Novel Liposomal Doxorubicin, in Patients With Advanced Solid Tumors. Available online: <https://clinicaltrials.gov/ct2/show/NCT03387917> (accessed on 7 September 2022).
  67. Mebiopharm Co., L. Safety Study of MBP-426 (Liposomal Oxaliplatin Suspension for Injection) to Treat Advanced or Metastatic Solid Tumors. *clinicaltrials.gov* Available online: <https://clinicaltrials.gov/ct2/show/NCT00355888> (accessed on 2 December 2014).
  68. Mebiopharm Co., L. Study of MBP-426 in Patients With Second Line Gastric, Gastroesophageal, or Esophageal Adenocarcinoma. Available online: <https://www.clinicaltrials.gov/ct2/show/NCT00964080> (accessed on 2 December 2014).
  69. Munster, P.; Krop, I.E.; LoRusso, P.; Ma, C.; Siegel, B.A.; Shields, A.F.; Molnár, I.; Wickham, T.J.; Reynolds, J.; Campbell, K.; et al. Safety and pharmacokinetics of MM-302, a HER2-targeted antibody–liposomal doxorubicin conjugate, in patients with advanced HER2-positive breast cancer: a phase 1 dose-escalation study. *Br. J. Cancer* **2018**, *119*, 1086–1093. <https://doi.org/10.1038/s41416-018-0235-2>.
  70. Celsion. Study of ThermoDox With Standardized Radiofrequency Ablation (RFA) for Treatment of Hepatocellular Carcinoma (HCC) (OPTIMA). Available online: <https://clinicaltrials.gov/ct2/show/NCT02112656> (accessed on 24 October 2018).
  71. Mebiopharm Co., L. Active targeting drug delivery system. Available online: <http://www.mebiopharm.com/english/pro.html> (accessed on 2021).
  72. Yonezawa, S.; Koide, H.; Asai, T. Recent advances in siRNA delivery mediated by lipid-based nanoparticles. *Adv. Drug Deliv. Rev.* **2020**, *154–155*, 64–78. <https://doi.org/10.1016/j.addr.2020.07.022>.
  73. Ely, A.; Singh, P.; Smith, T.S.; Arbuthnot, P. In vitro transcribed mRNA for expression of designer nucleases: Advantages as a novel therapeutic for the management of chronic HBV infection. *Adv. Drug Deliv. Rev.* **2021**, *168*, 134–146. <https://doi.org/10.1016/j.addr.2020.05.010>.
  74. McGoron, A.J. Perspectives on the Future of Nanomedicine to Impact Patients: An Analysis of US Federal Funding and Interventional Clinical Trials. *Bioconjugate Chem.* **2020**, *31*, 436–447. <https://doi.org/10.1021/acs.bioconjchem.9b00818>.
  75. ModernaTX, I., AstraZeneca. Dose Escalation Study of mRNA-2752 for Intratumoral Injection to Participants in Advanced Malignancies. Available online: <https://clinicaltrials.gov/ct2/show/NCT03739931> (accessed on 18 July 2022).
  76. ModernaTX, I. Dose Escalation and Efficacy Study of mRNA-2416 for Intratumoral Injection Alone and in Combination With Durvalumab for Participants With Advanced Malignancies. Available online: <https://clinicaltrials.gov/ct2/show/NCT03323398> (accessed on 11 July 2022).
  77. Institute, N.C. T4N5 Liposomal Lotion in Preventing The Recurrence of Nonmelanoma

- Skin Cancer in Patients Who Have Undergone a Kidney Transplant. Available online: <https://clinicaltrials.gov/ct2/show/NCT00089180> (accessed on 4 December 2015).
78. SE, B. Evaluation of the Safety and Tolerability of i.v. Administration of a Cancer Vaccine in Patients With Advanced Melanoma (Lipo-MERIT). Available online: <https://clinicaltrials.gov/ct2/show/NCT02410733> (accessed on 24 August 2022).
79. ModernaTX, I., Merck Sharp & Dohme Corp. An Efficacy Study of Adjuvant Treatment With the Personalized Cancer Vaccine mRNA-4157 and Pembrolizumab in Participants With High-Risk Melanoma (KEYNOTE-942). Available online: <https://clinicaltrials.gov/ct2/show/NCT03897881> (accessed on 24 August 2022).
80. Ebinger, J.E.; Fert-Bober, J.; Printsev, I.; Wu, M.; Sun, N.; Prostko, J.C.; Frias, E.C.; Stewart, J.L.; Van Eyk, J.E.; Braun, J.G.; et al. Antibody responses to the BNT162b2 mRNA vaccine in individuals previously infected with SARS-CoV-2. **Nat. Med.** **2021**, *27*, 981–984. <https://doi.org/10.1038/s41591-021-01325-6>.
